# Supplementary material
Source: PubMed Central journal article supplement (PMC8130796)
Supplement: 41571_2021_507_MOESM1_ESM.pdf [file 41571_2021_507_MOESM1_ESM.pdf]

**Supplementary information**

---

**Intratumoural administration and tumour tissue targeting of cancer immunotherapies**

---

In the format provided by the authors and unedited

**Supplementary Table 1 | Ongoing trials of intratumoural PRR agonist therapies**

| Target | Agent                   | Trial name                                                                                                                                                                                                                             | ClinicalTrials.gov identifier |
|--------|-------------------------|----------------------------------------------------------------------------------------------------------------------------------------------------------------------------------------------------------------------------------------|-------------------------------|
| TLR3   | Poly I:C                | In Situ Vaccine for Low-Grade Lymphoma: Combination of Intratumoral Flt3L and Poly-ICLC With Low-Dose Radiotherapy                                                                                                                     | NCT01976585                   |
| TLR3   | Poly I:C                | In Situ, Autologous Therapeutic Vaccination Against Solid Cancers With Intratumoral Hiltonol®                                                                                                                                          | NCT02423863                   |
| TLR3   | Poly I:C                | Neoadjuvant Hiltonol® (PolyICLC) for Prostate Cancer                                                                                                                                                                                   | NCT03262103                   |
| TLR3   | Poly I:C                | Vaccination With Flt3L, Radiation, and Poly-ICLC                                                                                                                                                                                       | NCT03789097                   |
| TLR-3  | Hiltonol                | Poly-ICLC (Hiltonol®) Vaccine In Malignant Pleural Mesothelioma                                                                                                                                                                        | NCT04525859                   |
| TLR4   | G100                    | Atezolizumab Combined With Intratumoral G100 AnD Immunogenic Radiotherapy in Patients With Advanced Solid Tumors                                                                                                                       | NCT03915678                   |
| TLR7   | LHC165                  | Study of the Safety and Efficacy of LHC165 Single Agent and in Combination With PDR001 in Patients With Advanced Malignancies                                                                                                          | NCT03301896                   |
| TLR7/8 | NKTR-262                | A Study of NKTR-262 in Combination With Bempegaldesleukin (NKTR-214) and With Bempegaldesleukin Plus Nivolumab in Patients With Locally Advanced or Metastatic Solid Tumor Malignancies                                                | NCT03435640                   |
| TLR8   | VTX-2337                | A Study to Evaluate Immune Biomarker Modulation in Response to VTX-2337 in Combination With an Anti- PD-1 Inhibitor in Head and Neck Cancer                                                                                            | NCT03906526                   |
| TLR8   | Motolimod               | Intratumoral Microdosing of Motolimod in HNSCC                                                                                                                                                                                         | NCT04272333                   |
| TLR9   | Tilsotolimod (IMO-2125) | Intratumoral Tilsotolimod, a TLR-9 Agonist, Together With Intratumoral Ipilimumab and Intravenous Nivolumab in Patients With Advanced Cancers                                                                                          | NCT04270864                   |
| TLR9   | Tilsotolimod (IMO-2125) | A Randomized Controlled Phase II Trial With Intradermal IMO-2125 in Pathological Tumor Stage (p) T3-4 cN0M0 Melanoma (INTRIM)                                                                                                          | NCT04126876                   |
| TLR9   | Tilsotolimod (IMO-2125) | A Study of IMO-2125 in Combination With Ipilimumab Versus Ipilimumab Alone in Subjects With Anti-PD-1 Refractory Melanoma (ILLUMINATE-301)                                                                                             | NCT03445533                   |
| TLR9   | Tilsotolimod (IMO-2125) | Study of Tilsotolimod in Combination With Nivolumab and Ipilimumab for the Treatment of Solid Tumors (ILLUMINATE-206)                                                                                                                  | NCT03865082                   |
| TLR9   | ABBV-368                | A Study to Determine the Safety, Tolerability, Pharmacokinetics, and Preliminary Efficacy of ABBV-368 Plus Tilsotolimod and Other Therapy Combinations in Participants With Recurrent/Metastatic Head and Neck Squamous Cell Carcinoma | NCT04196283                   |
| TLR9   | MGN1703                 | Ipilimumab (Immunotherapy) and MGN1703 (TLR Agonist) in Patients With Advanced Solid Malignancies                                                                                                                                      | NCT02668770                   |
| TLR9   | CMP-001                 | Clinical Study of CMP-001 in Combination With Pembrolizumab or as a Monotherapy                                                                                                                                                        | NCT02680184                   |
| TLR9   | CMP-001                 | Phase 1B Study Evaluating Alternative Routes of Administration of CMP-001 in Combination With Pembrolizumab in Participants With Advanced Melanoma                                                                                     | NCT03084640                   |
| TLR9   | CMP-001                 | CMP-001 for Relapsed and Refractory Lymphoma                                                                                                                                                                                           | NCT03983668                   |
| TLR9   | CMP-001                 | Combined Immunotherapy and Radiosurgery for Metastatic Colorectal Cancer                                                                                                                                                               | NCT03507699                   |
| TLR9   | CMP-001                 | CMP-001 in Combo With Nivolumab in Stage IIIB/C/D Melanoma Patients With Clinically Apparent Lymph Node Disease                                                                                                                        | NCT03618641                   |
| TLR9   | CMP-001                 | CMP-001 and INCAGN01949 for Patients With Stage IV Pancreatic Cancer and Other Cancers Except Melanoma                                                                                                                                 | NCT04387071                   |
| TLR9   | SD-101                  | SD-101, Nivolumab, and Radiation Therapy in Treating Patients With Chemotherapy-Refractory Metastatic Pancreatic Cancer                                                                                                                | NCT04050085                   |
| TLR9   | SD-101                  | TLR9 Agonist SD-101, Ibrutinib, and Radiation Therapy in Treating Patients With Relapsed or Refractory Grade 1-3A Follicular Lymphoma                                                                                                  | NCT02927964                   |
| TLR9   | SD-101                  | Pembrolizumab +/- SD-101 in Hormone-Naïve Oligometastatic Prostate Cancer With RT and iADT                                                                                                                                             | NCT03007732                   |
| TLR9   | SD-101                  | UCDCC#271: Phase I/II Trial of Epcadostat, Intralesional SD101, Radiotherapy in Patients With Lymphoma                                                                                                                                 | NCT03322384                   |
| TLR9   | SD-101                  | TLR9 Agonist SD-101, Anti-OX40 Antibody BMS 986178, and Radiation Therapy in Treating Patients With Low-Grade B-Cell Non-Hodgkin Lymphomas                                                                                             | NCT03410901                   |
| TLR9   | Cavrotolimod            | Intratumoral Cavrotolimod Combined With Pembrolizumab or Cemiplimab in Patients With Advanced Solid Tumors                                                                                                                             | NCT03684785                   |

|                      |                       |                                                                                                                                                                                                                                                                                   |             |
|----------------------|-----------------------|-----------------------------------------------------------------------------------------------------------------------------------------------------------------------------------------------------------------------------------------------------------------------------------|-------------|
| TLR3, MDA5 and RIG-I | BO-112                | Nivolumab and BO-112 Before Surgery for the Treatment of Resectable Soft Tissue Sarcoma                                                                                                                                                                                           | NCT04420975 |
| TLR3, MDA5 and RIG-I | BO-112                | Study of BO-112 With Pembrolizumab for Colorectal or Gastric/GEJ Cancer With Liver Metastasis                                                                                                                                                                                     | NCT04508140 |
| TLR7/8 and RIG-I     | CV8102                | Study of Intratumoral CV8102 in cMEL, cSCC, hnSCC, and ACC                                                                                                                                                                                                                        | NCT03291002 |
| RIG-I                | MK-4621               | Intratumoral/Intralesional Administration of MK-4621/JetPEI™ With or Without Pembrolizumab in Participants With Advanced/Metastatic or Recurrent Solid Tumors (MK-4621-002)                                                                                                       | NCT03739138 |
| STING                | MIW815                | Safety and Efficacy of MIW815 (ADU-S100) +/- Ipilimumab in Patients With Advanced/Metastatic Solid Tumors or Lymphomas                                                                                                                                                            | NCT02675439 |
| STING                | MK-1454               | Study of MK-1454 Alone or in Combination With Pembrolizumab (MK-3475) in Participants With Advanced/Metastatic Solid Tumors or Lymphomas (MK-1454-001)                                                                                                                            | NCT03010176 |
| STING                | MK-1454               | Study of Intratumoral (IT) MK-1454 in Combination With Intravenous (IV) Pembrolizumab (MK-3475) Compared to IV Pembrolizumab Alone as the First Line Treatment of Metastatic or Unresectable, Recurrent Head and Neck Squamous Cell Carcinoma (HNSCC) (MK-1454-002)               | NCT04220866 |
| STING                | MIW815                | Study of the Safety and Efficacy of MIW815 With PDR001 to Patients With Advanced/Metastatic Solid Tumors or Lymphomas                                                                                                                                                             | NCT03172936 |
| STING                | MK-2118               | Study of MK-2118 Administered as Intratumoral Injection as Monotherapy and in Combination With Pembrolizumab (MK-3475) or by Subcutaneous Injection in Combination With Pembrolizumab in the Treatment of Adults With Advanced/Metastatic Solid Tumors or Lymphomas (MK-2118-001) | NCT03249792 |
| STING                | ADU-S100              | Efficacy and Safety Trial of ADU-S100 and Pembrolizumab in Head and Neck Cancer                                                                                                                                                                                                   | NCT03937141 |
| STING                | BMS-986301            | An Investigational Immunotherapy Study of BMS-986301 Alone or in Combination With Nivolumab, and Ipilimumab in Participants With Advanced Solid Cancers                                                                                                                           | NCT03956680 |
| STING                | IMSA101               | Safety and Efficacy Study of IMSA101 in Refractory Malignancies                                                                                                                                                                                                                   | NCT04020185 |
| STING                | E7766                 | Study of Intratumorally Administered Stimulator of Interferon Genes (STING) Agonist E7766 in Participants With Advanced Solid Tumors or Lymphomas - INSTAL-101                                                                                                                    | NCT04144140 |
| STING                | BI 1387446            | A Study to Find the Best Dose of BI 1387446 Alone or in Combination With BI 754091 in Patients With Different Types of Advanced or Metastatic Cancer (Solid Tumors)                                                                                                               | NCT04147234 |
| STING or NLRP3       | TAK-676 or BMS-986299 | Phase 0 Master Protocol for CIVO Intratumoral Microdosing of Anti-Cancer Therapies                                                                                                                                                                                                | NCT04541108 |

MDA-5, melanoma differentiation-associated protein 5; poly I:C, polyinosinic-polycytidylic acid; PRR, pattern recognition receptor; RIG-1, retinoic acid-inducible gene; STING, stimulator of interferon genes; TLR, Toll-like receptor.

**Supplementary Table 2 | Ongoing trials of intratumoural viral therapies**

| Type of virus  | Agent                      | Trial name                                                                                                                                                                                                                        | ClinicalTrials.gov identifier |
|----------------|----------------------------|-----------------------------------------------------------------------------------------------------------------------------------------------------------------------------------------------------------------------------------|-------------------------------|
| Adenovirus     | VCN-01                     | Safety, Tolerability, and Efficacy of VCN-01 With Durvalumab in R/M Head and Neck Squamous Cell Carcinoma                                                                                                                         | NCT03799744                   |
| Adenovirus     | Ad-RTS-hIL-12              | A Study of Ad-RTS-hIL-12 With Veledimex in Subjects With Glioblastoma or Malignant Glioma                                                                                                                                         | NCT02026271                   |
| Adenovirus     | DNX-2401                   | Combination Adenovirus + Pembrolizumab to Trigger Immune Virus Effects (CAPTIVE)                                                                                                                                                  | NCT02798406                   |
| Adenovirus     | DNX-2401                   | Oncolytic Adenovirus, DNX-2401, for Naive Diffuse Intrinsic Pontine Gliomas                                                                                                                                                       | NCT03178032                   |
| Adenovirus     | DNX-2440                   | DNX-2440 Oncolytic Adenovirus for Recurrent Glioblastoma                                                                                                                                                                          | NCT03714334                   |
| Adenovirus     | LOAd703                    | LOAd703 Oncolytic Virus Therapy for Pancreatic Cancer                                                                                                                                                                             | NCT02705196                   |
| Adenovirus     | CAdVEC                     | Binary Oncolytic Adenovirus in Combination With HER2-Specific Autologous CAR VST, Advanced HER2 Positive Solid Tumors                                                                                                             | NCT03740256                   |
| Adenovirus     | OBP-301                    | Evaluate Efficacy, Immunological Response of Intratumoral/Intralesional Oncolytic Virus (OBP-301) in Metastatic Melanoma                                                                                                          | NCT03190824                   |
| Adenovirus     | MTG201                     | MTG201 Plus Nivolumab in Patients With Relapsed Pleural Mesothelioma                                                                                                                                                              | NCT04013334                   |
| Adenovirus     | OBP-301                    | Phase I Study to Evaluate the Safety and Efficacy of Telomelysin (OBP-301) in Patients With Hepatocellular Carcinoma                                                                                                              | NCT02293850                   |
| Adenovirus     | ORCA-010                   | First in Man Clinical Study to Evaluate Safety and Tolerability of an Oncolytic Adenovirus in Prostate Cancer Patients.                                                                                                           | NCT04097002                   |
| Adenovirus     | LOAd703                    | Trial Investigating an Immunostimulatory Oncolytic Adenovirus for Cancer                                                                                                                                                          | NCT03225989                   |
| Adenovirus     | DNX-2401                   | Combination Adenovirus + Pembrolizumab to Trigger Immune Virus Effects                                                                                                                                                            | NCT02798406                   |
| Adenovirus     | ONCOS-102                  | A Pilot Study of Sequential ONCOS-102, an Engineered Oncolytic Adenovirus Expressing GMCSF, and Pembrolizumab in Patients With Advanced or Unresectable Melanoma Progressing After Programmed Cell Death Protein 1 (PD1) Blockade | NCT03003676                   |
| Adenovirus     | ASN-002                    | Safety and Efficacy of ASN-002 Combined With a Hedgehog Pathway Inhibitor                                                                                                                                                         | NCT04416516                   |
| Adenovirus     | Ad5-yCD/mutTKSR39rep-hIL12 | Phase 1 Trial of Interleukin 12 Gene Therapy for Metastatic Pancreatic Cancer                                                                                                                                                     | NCT03281382                   |
| Adenovirus     | GMCI                       | Neoadjuvant GMCI Plus Chemoradiation for Advanced Non-Metastatic Pancreatic Adenocarcinoma                                                                                                                                        | NCT02446093                   |
| Adenovirus     | OBP-301                    | Special Combination of OBP-301 and Pembrolizumab                                                                                                                                                                                  | NCT03172819                   |
| Adenovirus     | OBP-301                    | Evaluate Efficacy, Immunological Response of Intratumoral/Intralesional Oncolytic Virus (OBP-301) in Metastatic Melanoma                                                                                                          | NCT03190824                   |
| Vaccinia Virus | Pexa-Vec                   | Immunization Strategy With Intra-tumoral Injections of Pexa-Vec With Ipilimumab in Metastatic / Advanced Solid Tumors.                                                                                                            | NCT02977156                   |
| Vaccinia Virus | ASP9801                    | A Study of an Intratumoral Oncolytic Virus in Patients With Advanced Metastatic Solid Tumors                                                                                                                                      | NCT03954067                   |
| Vaccinia Virus | Pexa-Vec                   | A Trial to Evaluate the Safety and Efficacy of the Combination of the Oncolytic Immunotherapy Pexa-Vec With the PD-1 Receptor Blocking Antibody Nivolumab in the First-line Treatment of Advanced Hepatocellular Carcinoma (HCC)  | NCT03071094                   |
| Vaccinia Virus | Pexa-Vec                   | A Study of Recombinant Vaccinia Virus in Combination With REGN2810 for Renal Cell Carcinoma                                                                                                                                       | NCT03294083                   |
| Vaccinia Virus | Pexa-Vec                   | Hepatocellular Carcinoma Study Comparing Vaccinia Virus Based Immunotherapy Plus Sorafenib vs Sorafenib Alone                                                                                                                     | NCT02562755                   |
| Vaccinia Virus | TBio-6517                  | Study of TBio-6517, Given Intratumorally, Alone or in Combination With Pembrolizumab, in Solid Tumors                                                                                                                             | NCT04301011                   |

|                                          |                        |                                                                                                                                                                                                              |             |
|------------------------------------------|------------------------|--------------------------------------------------------------------------------------------------------------------------------------------------------------------------------------------------------------|-------------|
| Modified Vaccinia Ankara–Bavarian Nordic | MVA-BN-Brachyury       | Perioperative Atezolizumab With MVA-BN-Brachyury and PROSTVAC For Intermediate-Risk And High-Risk Localized Prostate Cancer                                                                                  | NCT04020094 |
| Dengue Virus                             | PV-001-DV              | Arm 2: Intratumoral Injection of Dengue Virus-1 #45AZ5 (PV-001-DV) in Patients With Advanced Melanoma                                                                                                        | NCT03989895 |
| Dengue Virus                             | PV-001-DV              | Arm 3: Intratumoral Injection of PV-001-DV in Combination With Infusion of PV-001-DC in Patients With Advanced Melanoma                                                                                      | NCT03990493 |
| Newcastle disease virus                  | V938                   | A Study of Intratumoral/Intralesional Administration of V938 in Combination With Pembrolizumab (MK-3475) in Participants With Advanced/Metastatic or Recurrent Malignancies (V938-001)                       | NCT04135352 |
| Measles virus                            | TMV-018                | A Safety Study of TMV-018 in Patients With Tumors of the Gastrointestinal Tract                                                                                                                              | NCT04195373 |
| Measles Virus                            | MV-s-NAP               | A Vaccine (MV-s-NAP) for the Treatment of Patients With Invasive Metastatic Breast Cancer                                                                                                                    | NCT04521764 |
| Measles Virus                            | MV-NIS                 | Viral Therapy In Treating Patients With Recurrent or Metastatic Squamous Cell Carcinoma of the Head and Neck Cancer or Metastatic Breast Cancer                                                              | NCT01846091 |
| Coxsackie Virus                          | V937                   | A Study of V937 in Combination With Pembrolizumab (MK-3475) in Participants With Advanced/Metastatic Solid Tumors (V937-013)                                                                                 | NCT04521621 |
| Coxsackie Virus                          | V937                   | Efficacy, Safety, and Tolerability of V937 Administered Intravenously or Intratumorally With Pembrolizumab (MK-3475) Versus Pembrolizumab Alone in Participants With Advanced/Metastatic Melanoma (V937-011) | NCT04152863 |
| Vesicular Stomatitis Virus               | VSV-IFN $\beta$ -TYRP1 | Modified Virus VSV-IFN $\beta$ TYRP1 in Treating Patients With Stage III-IV Melanoma                                                                                                                         | NCT03865212 |
| Vesicular Stomatitis Virus               | VSV-IFN $\beta$        | Viral Therapy in Treating Patient With Refractory Liver Cancer or Advanced Solid Tumors                                                                                                                      | NCT01628640 |
| Vesicular Stomatitis Virus               | VSV-IFN $\beta$ -NIS   | Administration of VSV-IFN $\beta$ -NIS Monotherapy and in Combination With Avelumab in Patients With Refractory Solid Tumors                                                                                 | NCT02923466 |
| Vesicular Stomatitis Virus               | Voyager V1             | Phase 2 Trial of Voyager V1 in Combination With Cemiplimab in Cancer Patients                                                                                                                                | NCT04291105 |
| Fowlpox Virus                            | falimarev              | Vaccine Therapy and Sargramostim in Treating Patients With Pancreas Cancer That Cannot Be Removed By Surgery                                                                                                 | NCT00669734 |
| Maraba Virus                             | MG1-MAGEA3             | MG1-MAGEA3 With Ad-MAGEA3 and Pembrolizumab in Patients With Previously Treated Metastatic Melanoma or Cutaneous Squamous Cell Carcinoma                                                                     | NCT03773744 |
| Maraba Virus                             | MG1-E6E7               | This is a Trial of MG1-E6E7 With Ad-E6E7 and Atezolizumab in Patients With HPV Associated Cancers                                                                                                            | NCT03618953 |
| Poliovirus                               | PVSRIPO                | PVSRIPO for Recurrent Glioblastoma (GBM)                                                                                                                                                                     | NCT01491893 |
| Poliovirus                               | PVSRIPO                | PVSRIPO and Pembrolizumab in Patients With Recurrent Glioblastoma                                                                                                                                            | NCT04479241 |
| Polio Virus                              | PVSRIPO                | Examining Bioactivity of PVSRIPO in Invasive Breast Cancer                                                                                                                                                   | NCT03564782 |
| Poliovirus                               | PVSRIPO                | PVSRIPO for Patients With Unresectable Melanoma                                                                                                                                                              | NCT03712358 |
| Arenavirus                               | HB-201                 | A Study of TheraT $\text{\textcircled{R}}$ Vector(s) Expressing HPV 16+ in Patients With HPV 16+ Confirmed Cancers                                                                                           | NCT04180215 |
| Herpes Simplex Virus-1                   | ONCR-177               | Study of ONCR-177 Alone and in Combination With PD-1 Blockade in Adult Subjects With Advanced and/or Refractory Cutaneous, Subcutaneous or Metastatic Nodal Solid Tumors                                     | NCT04348916 |
| Herpes Simplex Virus-                    | RP1                    | A Phase 1B Study of RP1 in Transplant Patients With Advanced Cutaneous Squamous Cell Carcinoma                                                                                                               | NCT04349436 |
| Herpes Simplex Virus-1                   | RP1                    | Study of RP1 Monotherapy and RP1 in Combination With Nivolumab                                                                                                                                               | NCT03767348 |
| Herpes Simplex Virus-1                   | RP1                    | Study Evaluating Cemiplimab Alone and Combined With RP1 in Treating Advanced Squamous Skin Cancer                                                                                                            | NCT04050436 |
| Herpes Simplex Virus-1                   | HSV G207               | HSV G207 With a Single Radiation Dose in Children With Recurrent High-Grade Glioma                                                                                                                           | NCT04482933 |
| Herpes Simplex Virus-1                   | T3011                  | A Clinical Study of T3011 in Patients With Advanced Cutaneous or Subcutaneous Malignancies                                                                                                                   | NCT04370587 |

|                        |                 |                                                                                                                                                            |             |
|------------------------|-----------------|------------------------------------------------------------------------------------------------------------------------------------------------------------|-------------|
| Herpes Simplex Virus-1 | OrienX010       | Study to Evaluate OrienX010 in Combination With JS001 in the Treatment of Stage IV (M1c) Liver Metastasis From Melanoma                                    | NCT04206358 |
| Herpes Simplex Virus-1 | OrienX010       | Clinical Study to Evaluate OrienX010 in Combination With Treprizumab Injection as Neoadjuvant Treatment in Melanoma                                        | NCT04197882 |
| Herpes Simplex Virus-1 | OrienX010       | A Clinical Study to Evaluate the Safety and Efficacy of OrienX010 in Unresectable Malignant Melanoma Patients                                              | NCT04200040 |
| Herpes Simplex Virus   | GEN2            | GEN2 Directed Cancer Immunotherapy Trial                                                                                                                   | NCT04313868 |
| Herpes Simplex Virus-1 | rQNestin34.5v.2 | A Study of the Treatment of Recurrent Malignant Glioma With rQNestin34.5v.2                                                                                | NCT03152318 |
| Herpes Simplex Virus-1 | T-VEC           | Single-arm Trial to Evaluate the Role of the Immune Response to Talimogene Laherparepvec in Unresected Melanoma                                            | NCT02366195 |
| Herpes Simplex Virus-1 | T-VEC           | Combining Talimogene Laherparepvec With BRAF and MEK Inhibitors in BRAF Mutated Advanced Melanoma                                                          | NCT03088176 |
| Herpes Simplex Virus-1 | T-VEC           | Combination of Talimogene Laherparepvec With Atezolizumab in Early Breast Cancer                                                                           | NCT03802604 |
| Herpes Simplex Virus-1 | T-VEC           | Neoadjuvant T-VEC in High Risk Early Melanoma                                                                                                              | NCT04427306 |
| Herpes Simplex Virus-1 | T-VEC           | Study of Talimogene Laherparepvec (T-VEC) in Pancreatic Cancer                                                                                             | NCT03086642 |
| Herpes Simplex Virus-1 | T-VEC           | Ipilimumab With or Without Talimogene Laherparepvec in Unresected Melanoma                                                                                 | NCT01740297 |
| Herpes Simplex Virus-1 | T-VEC           | Neoadjuvant T-VEC in High Risk Early Melanoma                                                                                                              | NCT04427306 |
| Herpes Simplex Virus-1 | T-VEC           | A Study of T-VEC (Talimogene Laherparepvec) With or Without Radiotherapy for Melanoma, Merkel Cell Carcinoma, or Other Solid Tumors                        | NCT02819843 |
| Herpes Simplex Virus-1 | T-VEC           | Study of T-VEC in Locally Advanced Cutaneous Angiosarcoma                                                                                                  | NCT03921073 |
| Herpes Simplex Virus-1 | T-VEC           | TVEC and Preop Radiation for Sarcoma                                                                                                                       | NCT02453191 |
| Herpes Simplex Virus-1 | T-VEC           | Study of Talimogene Laherparepvec In Children With Advanced Non CNS Tumors                                                                                 | NCT02756845 |
| Herpes Simplex Virus-1 | T-VEC           | Neo-adjuvant T-VEC + Nivolumab Combination Therapy for Resectable Early Metastatic (Stage IIIB/C/D-IV M1a) Melanoma With Injectable Disease                | NCT04330430 |
| Herpes Simplex Virus-1 | T-VEC           | Neoadjuvant Combination Immunotherapy for Stage III Melanoma                                                                                               | NCT03842943 |
| Herpes Simplex Virus-1 | T-VEC           | Trial to Evaluate the Safety of Talimogene Laherparepvec Injected Into Tumors Alone and in Combination With Systemic Pembrolizumab MK-3475-611/Keynote-611 | NCT02509507 |
| Herpes Simplex Virus-1 | T-VEC           | T-VEC in Non-melanoma Skin Cancer                                                                                                                          | NCT03458117 |
| Herpes Simplex Virus-1 | T-VEC           | Phase II Multicenter Study of Talimogene Laherparepvec in Classic or Endemic Kaposi Sarcoma                                                                | NCT04065152 |
| Herpes Simplex Virus-1 | T-VEC           | Study of Talimogene Laherparepvec With Atezolizumab for Triple Negative Breast Cancer and Colorectal Cancer With Liver Metastases                          | NCT03256344 |
| Herpes Simplex Virus-1 | T-VEC           | Single-arm Trial to Evaluate the Role of the Immune Response to Talimogene Laherparepvec in Unresected Melanoma                                            | NCT02366195 |
| Herpes Simplex Virus-1 | T-VEC           | Study to Evaluate the Safety/ Efficacy of T-VEC in Japanese Subjects With Unresectable Stage IIIB-IV Malignant Melanoma                                    | NCT03064763 |
| Herpes Simplex Virus-1 | T-VEC           | Efficacy and Safety of Talimogene Laherparepvec Neoadjuvant Treatment Plus Surgery Versus Surgery Alone for Melanoma                                       | NCT02211131 |
| Herpes Simplex Virus-1 | T-VEC           | Pembrolizumab With or Without Talimogene Laherparepvec or Talimogene Laherparepvec Placebo in Unresected Melanoma (KEYNOTE-034)                            | NCT02263508 |
| Herpes Simplex Virus-1 | T-VEC           | Talimogene Laherparepvec With Pembrolizumab in Melanoma Following Progression on Prior Anti-PD-1 Based Therapy (MASTERKEY-115)                             | NCT04068181 |

|                        |                 |                                                                                                                                                                   |             |
|------------------------|-----------------|-------------------------------------------------------------------------------------------------------------------------------------------------------------------|-------------|
| Herpes Simplex Virus-1 | T-VEC           | Trial to Evaluate the Safety of Talimogene Laherparepvec Injected Into Tumors Alone and in Combination With Systemic Pembrolizumab MK-3475-611/Keynote-611        | NCT02509507 |
| Herpes Simplex Virus-1 | T-VEC           | Single-arm Trial to Evaluate the Role of the Immune Response to Talimogene Laherparepvec in Unresected Melanoma (TVEC-325)                                        | NCT02366195 |
| Herpes Simplex Virus-1 | T-VEC           | Talimogene Laherparepvec With Chemotherapy or Endocrine Therapy in Treating Participants With Metastatic, Unresectable, or Recurrent HER2- Negative Breast Cancer | NCT03554044 |
| Herpes Simplex Virus-1 | T-VEC           | A Study of Talimogene Laherparepvec (T-VEC) in Combination With Pembrolizumab in Patients With Metastatic and/or Locally Advanced Sarcoma                         | NCT03069378 |
| Herpes Simplex Virus-1 | T-VEC           | Talimogene Laherparepvec and Pembrolizumab in Treating Patients With Stage III-IV Melanoma                                                                        | NCT02965716 |
| Herpes Simplex Virus-1 | TBI-1401 (HF10) | Phase I Study of TBI-1401(HF10) Plus Chemotherapy in Patients With Unresectable Pancreatic Cancer.                                                                | NCT03252808 |
| Herpes Simplex Virus-1 | TBI-1401 (HF10) | Neoadjuvant Trial of Nivolumab in Combination With HF10 Oncolytic Viral Therapy in Resectable Stage IIIB, IIIC, IVM1a Melanoma                                    | NCT03259425 |

**Supplementary Table 3 | Ongoing trials of intratumoural ICD-inducer therapies**

| Type of ICD inducer                                                                              | Trial Name                                                                                                                                                                                                              | ClinicalTrials.gov identifier |
|--------------------------------------------------------------------------------------------------|-------------------------------------------------------------------------------------------------------------------------------------------------------------------------------------------------------------------------|-------------------------------|
| Rose bengal                                                                                      | A Study to Assess PV-10 Chemoablation of Cancer of the Liver                                                                                                                                                            | NCT00986661                   |
| Rose bengal                                                                                      | PV-10 in Combination With Pembrolizumab for Treatment of Metastatic Melanoma                                                                                                                                            | NCT02557321                   |
| Rose bengal                                                                                      | A Phase 1 Study of PV-10 Chemoablation of Neuroendocrine Tumours (NET) Metastatic to the Liver                                                                                                                          | NCT02693067                   |
| Cisplatin and vinblastine                                                                        | A Phase 1/2 Safety Study of Intratumorally Dosed INT230-6                                                                                                                                                               | NCT03058289                   |
| Nucleotide analogues (produced via adenoviral delivery of herpes simplex virus thymidine kinase) | Intratumoral Gene Mediated Cytotoxic Immunotherapy in Patients With Resectable Non-Small Cell Lung Cancer                                                                                                               | NCT03131037                   |
| p53                                                                                              | Safety and Efficacy of p53 Gene Therapy Combined With Immune Checkpoint Inhibitors in Solid Tumors.                                                                                                                     | NCT03544723                   |
| Polidocanol (macrogol)                                                                           | Intralesional Sclerosant for in Transit and Cutaneous Melanoma Metastases                                                                                                                                               | NCT03754140                   |
| N-dihydrogalactochitosan                                                                         | Intratumoral Injection of IP-001 Following Thermal Ablation in Patients With Advanced Solid Tumors.                                                                                                                     | NCT03993678                   |
| CyPep-1                                                                                          | CyPep-1 Injections in Cancer Inducing Lymphocyte Infiltrate Accumulations                                                                                                                                               | NCT04260529                   |
| Tigilanol tiglate                                                                                | Exploratory Phase Ib/IIa Study of Intratumourally Administered Tigilanol Tiglate to Assess Safety, Tolerability and Tumour Response in Patients with Head and Neck Squamous Cell Carcinoma                              | ACTRN12619001407189           |
| Tigilanol tiglate                                                                                | Phase I Dose-Escalation Extension Study to Determine the Safety and Tolerability of Intratumoural Injection(s) of EBC-46                                                                                                | ACTRN12614001207606           |
| LTX-315 (Ruxotemitide)                                                                           | Phase 1 Dose-escalation Study of LTX-315 in Patients With a Transdermally Accessible Tumour                                                                                                                             | NCT01058616                   |
| LTX-315 (Ruxotemitide)                                                                           | A Phase I, Open-label, Multi-arm, Multi-centre, Multi-dose, Dose Escalation Study of LTX-315 as Monotherapy or in Combination With Either Ipilimumab or Pembrolizumab in Patients With Transdermally Accessible Tumours | NCT01986426                   |
| LTX-315 (Ruxotemitide)                                                                           | An Open Label Phase II Single Centre Study Investigating the Safety and Efficacy of LTX-315 and Adoptive T-cell Therapy in Patients With Advanced/Metastatic Soft Tissue Sarcoma                                        | NCT03725605                   |

ICD, immunogenic cell death.



**Supplementary Table 4 | Ongoing trials of intratumoural cytokine therapies**

| <b>Cytokine</b>                          | <b>Trial name</b>                                                                                                                                                                                  | <b>ClinicalTrials.gov identifier</b> |
|------------------------------------------|----------------------------------------------------------------------------------------------------------------------------------------------------------------------------------------------------|--------------------------------------|
| IL-2                                     | Pre-Treatment of Highly Suspicious Pigmented Skin Lesions With Interleukin-2                                                                                                                       | NCT03233828                          |
| IL-2                                     | UCDCC#272: IL-2, Radiotherapy, and Pembrolizumab in Patients Refractory to Checkpoint Blockade                                                                                                     | NCT03474497                          |
| IL-2                                     | The Response to Intralesional IL-2 and/or BCG Treatment for Cutaneous Metastatic Melanoma                                                                                                          | NCT03928275                          |
| IL-2                                     | IT-hu14.18-IL2 With Radiation, Nivolumab and Ipilimumab for Melanoma                                                                                                                               | NCT03958383                          |
| IL-2 and TNF                             | Efficacy of Daromun Neoadjuvant Intratumoral Treatment in Clinical Stage IIIB/C Melanoma Patients                                                                                                  | NCT03567889                          |
| IL-2 and TNF                             | Intratumoral Administration of Daromun in Non-melanoma Skin Cancer Patients (DUNCAN)                                                                                                               | NCT04362722                          |
| IL-12                                    | A Study of Ad-RTS-hIL-12 With Veledimex in Subjects With Glioblastoma or Malignant Glioma                                                                                                          | NCT02026271                          |
| IL-12                                    | Tavo and Pembrolizumab in Patients With Stage III/IV Melanoma Progressing on Pembrolizumab or Nivolumab Treatment                                                                                  | NCT03132675                          |
| IL-12                                    | A Study of Ad-RTS-hIL-12 + Veledimex in Pediatric Subjects With Brain Tumors Including DIPG                                                                                                        | NCT03330197                          |
| IL-12                                    | Tavo and Pembrolizumab With or Without Chemotherapy in Patients With Inoperable Locally Advanced or Metastatic TNBC                                                                                | NCT03567720                          |
| IL-12                                    | A Study of Ad-RTS-hIL-12 With Veledimex in Combination With Nivolumab in Subjects With Glioblastoma; a Substudy to ATI001-102                                                                      | NCT03636477                          |
| IL-12                                    | Evaluation of Ad-RTS-hIL-12 + Veledimex in Subjects With Recurrent or Progressive Glioblastoma, a Substudy to ATI001-102                                                                           | NCT03679754                          |
| IL-12                                    | Tavo With Electroporation, Pembrolizumab, and Epacadostat in Patients With Unresectable Head and Neck Cancer                                                                                       | NCT03823131                          |
| IL-12                                    | A Study of MEDI1191 in Sequential and Concurrent Combination With Durvalumab in Subjects With Advanced Solid Tumors                                                                                | NCT03946800                          |
| IL-12                                    | Study of Ad-RTS-hIL-12 + Veledimex in Combination With Cemiplimab in Subjects With Recurrent or Progressive Glioblastoma                                                                           | NCT04006119                          |
| IL-12                                    | Neoadjuvant Immunotherapy With Tavo + Electroporation in Combination With Nivo. in Melanoma Patients                                                                                               | NCT04526730                          |
| IL-23, IL-36γ and OX40L                  | Dose Escalation Study of mRNA-2752 for Intratumoral Injection to Patients With Advanced Malignancies                                                                                               | NCT03739931                          |
| sclL-12, IFNα-2b, GM-CSF and IL-15-sushi | A First-in-Human Dose Escalation and Expansion Study to Evaluate Intratumoral Administration of SAR441000 as Monotherapy and in Combination With Cemiplimab in Patients With Advanced Solid Tumors | NCT03871348                          |
| TGFβ1 siRNA                              | Open Label, Dose Escalation Study for the Safety and Efficacy of STP705 in Adult Patients With isSCC                                                                                               | NCT04293679                          |

GM-CSF, granulocyte-macrophage colony-stimulating factor; OX40L, OX40 ligand; sclL-12, single-chain IL-12; siRNA, small interfering RNA; TGFβ1, transforming growth factor β1; TNF, tumour necrosis factor.

**Supplementary Table 5 | Ongoing trials of intratumoural immune checkpoint-targeted therapies**

| Target         | Agent Name              | Trial name                                                                                                                                                  | ClinicalTrials.gov identifier |
|----------------|-------------------------|-------------------------------------------------------------------------------------------------------------------------------------------------------------|-------------------------------|
| CTLA4          | Ipilimumab              | Ipilimumab for Head and Neck Cancer Patients                                                                                                                | NCT02812524                   |
| CTLA4          | Ipilimumab              | A Trial Evaluating the Safety & Efficacy of Intra-Tumoral Ipilimumab in Combination With Intra-venous Nivolumab in Patients With Metastatic Melanoma        | NCT02857569                   |
| CTLA4          | Ipilimumab              | Intra-tumoral Ipilimumab Plus Intravenous Nivolumab Following the Resection of Recurrent Glioblastoma                                                       | NCT03233152                   |
| CTLA4          | Ipilimumab              | Intratumoral Tilsotolimod, a TLR-9 Agonist, Together With Intratumoral Ipilimumab and Intravenous Nivolumab in Patients With Advanced Cancers (PRIMO)       | NCT04270864                   |
| PD-1           | Pembrolizumab           | Pembrolizumab in High-risk Ductal Carcinoma in Situ (DCIS)                                                                                                  | NCT02872025                   |
| PD-1           | Nivolumab               | Intra-lesional Nivolumab Therapy for Limited Cutaneous Kaposi Sarcoma                                                                                       | NCT03316274                   |
| PD-1           | Cemiplimab              | Pre-Operative Cemiplimab Administered Intralesionally for Patients With Recurrent Cutaneous Squamous Cell Carcinoma                                         | NCT03889912                   |
| PD-1 and CTLA4 | Nivolumab<br>Ipilimumab | A Phase 2 Trial for Men With Metastatic Prostatic Adenocarcinoma                                                                                            | NCT04090775                   |
| CD40           | APX005M                 | APX005M in Combination With Systemic Pembrolizumab in Patients With Metastatic Melanoma                                                                     | NCT02706353                   |
| CD40           | ABBV-927                | A Study of ABBV-927 and ABBV-181, an Immunotherapy, in Participants With Advanced Solid Tumors                                                              | NCT02988960                   |
| CD40           | ABBV-927                | A Study to Assess the Effects of Multiple Study Drug Regimens in Subjects With Newly Diagnosed Locally Advanced Head and Neck Squamous Cell Carcinoma       | NCT03818542                   |
| CD40           | Selicrelumab            | Study of Intratumoral Selicrelumab With Atezolizumab in Patients With Refractory or Relapsed B Cell Lymphoma                                                | NCT03892525                   |
| CD40           | 2141 V-11               | A Study Investigating the Safety and Tolerability of an Immune Treatment in Cancer Patients With Lesions to the Skin                                        | NCT04059588                   |
| CD40           | SL-172154               | Ph1 Study of SL-172154 Administered Intratumorally in Subjects With Squamous Cell Carcinoma of the Head and Neck or Skin                                    | NCT04502888                   |
| CD40           | 2141-V11                | Phase 1 Trial of D2C7-IT in Combination With 2141-V11 for Recurrent Malignant Glioma                                                                        | NCT04547777                   |
| CD40 and CD27  | TriMix                  | Intratumoral TriMix Injections in Early Breast Cancer Patients                                                                                              | NCT03788083                   |
| OX40           | mRNA 2416               | Dose Escalation and Efficacy Study of mRNA 2416 for Intratumoral Injection Alone and in Combination With Durvalumab for Patients With Advanced Malignancies | NCT03323398                   |
| OX40           | BMS 986178              | TLR9 Agonist SD-101, Anti-OX40 Antibody BMS 986178, and Radiation Therapy in Treating Patients With Low-Grade B-Cell Non-Hodgkin Lymphomas                  | NCT03410901                   |
| CD137          | Urelumab                | Phase I-II Study of Intratumoral Urelumab Combined With Nivolumab in Patients With Solid Tumors                                                             | NCT03792724                   |

**Supplementary Table 6 | Ongoing trials of intratumoural adoptive cell therapies**

| <b>Type of cell therapy</b> | <b>Trial name</b>                                                                                                                                                              | <b>ClinicalTrials.gov identifier</b> |
|-----------------------------|--------------------------------------------------------------------------------------------------------------------------------------------------------------------------------|--------------------------------------|
| CAR T cell                  | Phase I Trial: T4 Immunotherapy of Head and Neck Cancer                                                                                                                        | NCT01818323                          |
| CAR T cell                  | Genetically Modified T-cells in Treating Patients With Recurrent or Refractory Malignant Glioma                                                                                | NCT02208362                          |
| CAR T cell                  | Memory-Enriched T Cells in Treating Patients With Recurrent or Refractory Grade III-IV Glioma                                                                                  | NCT03389230                          |
| CAR T cell                  | Interventional Therapy Sequential With the Fourth-generation CAR-T Targeting Nectin4/FAP for Malignant Solid Tumors                                                            | NCT03932565                          |
| CAR T cell                  | B7-H3 CAR-T for Recurrent or Refractory Glioblastoma                                                                                                                           | NCT04077866                          |
| CAR T cell                  | Pilot Study of B7-H3 CAR-T in Treating Patients With Recurrent and Refractory Glioblastoma                                                                                     | NCT04385173                          |
| DC                          | Sequential Intranodal Immunotherapy (SIIT) Combined With Anti-PD1 (Pembrolizumab) in Follicular Lymphoma                                                                       | NCT02677155                          |
| DC                          | Feasibility and Safety of IMP321 for Advanced Stage Solid Tumors                                                                                                               | NCT03252938                          |
| DC                          | Dendritic Cell Therapy After Cryosurgery in Combination With Pembrolizumab in Treating Patients With Stage III-IV Melanoma That Cannot Be Remove by Surgery                    | NCT03325101                          |
| DC                          | A Phase I/II, Safety Clinical Trial of DCVAC/PCa and ONCOS-102 in Men With Metastatic Castration-resistant Prostate Cancer                                                     | NCT03514836                          |
| DC                          | Intratumoral Administration of CCL21-gene Modified Dendritic Cell With Intravenous Pembrolizumab for Advanced NSCLC                                                            | NCT03546361                          |
| DC                          | Dendritic Cell Therapy for Brain Metastases From Breast- or Lung Cancer                                                                                                        | NCT03638765                          |
| DC                          | Intratumoral Injection of Autologous CD1c (BDCA-1)+ myDC, Avelumab, and Ipilimumab Plus Systemic Nivolumab                                                                     | NCT03707808                          |
| DC                          | A Study to Evaluate the Safety and Effectiveness of ILixadencel Administered Into Tumors in Combination With Checkpoint Inhibitor (CPI) in Patients With Advanced Cancer       | NCT03735290                          |
| DC                          | Arm 1: Infusion of Autologous Monocyte-derived Lysate Pulsed Dendritic Cells (PV-001-DC) in Patients With Advanced Melanoma                                                    | NCT03803397                          |
| DC                          | Modified Immune Cells (Autologous Dendritic Cells) and a Vaccine (Prevnar) After High-Dose External Beam Radiation Therapy in Treating Patients With Unresectable Liver Cancer | NCT03942328                          |
| NK cell                     | Intra-tumoral Injection of Natural Killer Cells in High-Grade Gliomas                                                                                                          | NCT04254419                          |
| NK cell                     | Natural Killer Cell (CYNK-001) IV Infusion or IT Administration in Adults With Recurrent GBM                                                                                   | NCT04489420                          |
| TILs                        | Engineered Immune Effectors Against Cervical Cancer                                                                                                                            | NCT03362619                          |

CAR, chimeric antigen receptor; DC, dendritic cell; NK, natural killer; TILs, tumour-infiltrating lymphocytes.

**Supplementary Table 7 | Trials of miscellaneous intratumoural immunotherapies**

| <b>Type</b>                        | <b>Trial name</b>                                                                                        | <b>ClinicalTrials.gov identifier</b> |
|------------------------------------|----------------------------------------------------------------------------------------------------------|--------------------------------------|
| Bacteria                           | Pembrolizumab With Intratumoral Injection of Clostridium Novyi-NT                                        | NCT03435952                          |
| Bacteria                           | Safety and Tolerability of SYN1891 Injection Alone or in Combination With Atezolizumab in Adult Subjects | NCT04167137                          |
| TAA                                | D2C7 for Adult Patients With Recurrent Malignant Glioma                                                  | NCT02303678                          |
| TAA                                | pDNA Intralesional Cancer Vaccine for Cutaneous Melanoma                                                 | NCT03655756                          |
| TAA                                | IT-hu14.18-IL2 With Radiation, Nivolumab and Ipilimumab for Melanoma                                     | NCT03958383                          |
| TAA                                | Immunotherapy With IFx-Hu2.0 Vaccine for Advanced MCC or cSCC                                            | NCT04160065                          |
| Cathelicidin antimicrobial peptide | Intratumoral Injections of LL37 for Melanoma                                                             | NCT02225366                          |

TAA, tumour-associated antigen.
